# Supplementary material
Source: PubMed Central journal article supplement (PMC5718363)
Supplement: NIHMS776306-supplement-1.pdf [file NIHMS776306-supplement-1.pdf]

**Cell Reports, Volume 15**

**Supplemental Information**

**Multiphasic and Dynamic Changes in Alternative  
Splicing during Induction of Pluripotency Are  
Coordinated by Numerous RNA-Binding Proteins**

**Benjamin Cieply, Juw Won Park, Angela Nakauka-Ddamba, Thomas W. Bebee, Yang Guo, Xuequn Shang, Christopher J. Lengner, Yi Xing, and Russ P. Carstens**

# Figure S1.

**A.**

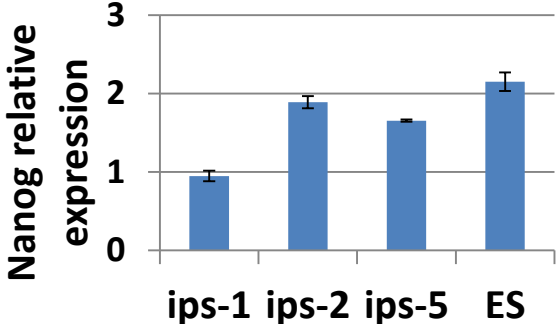

**B.**

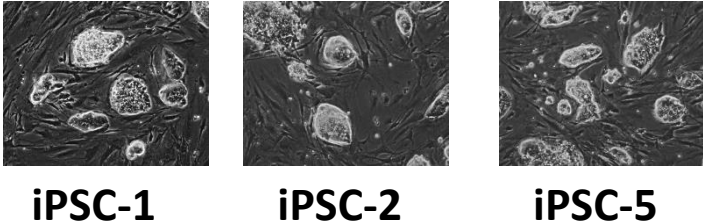

# Figure S2

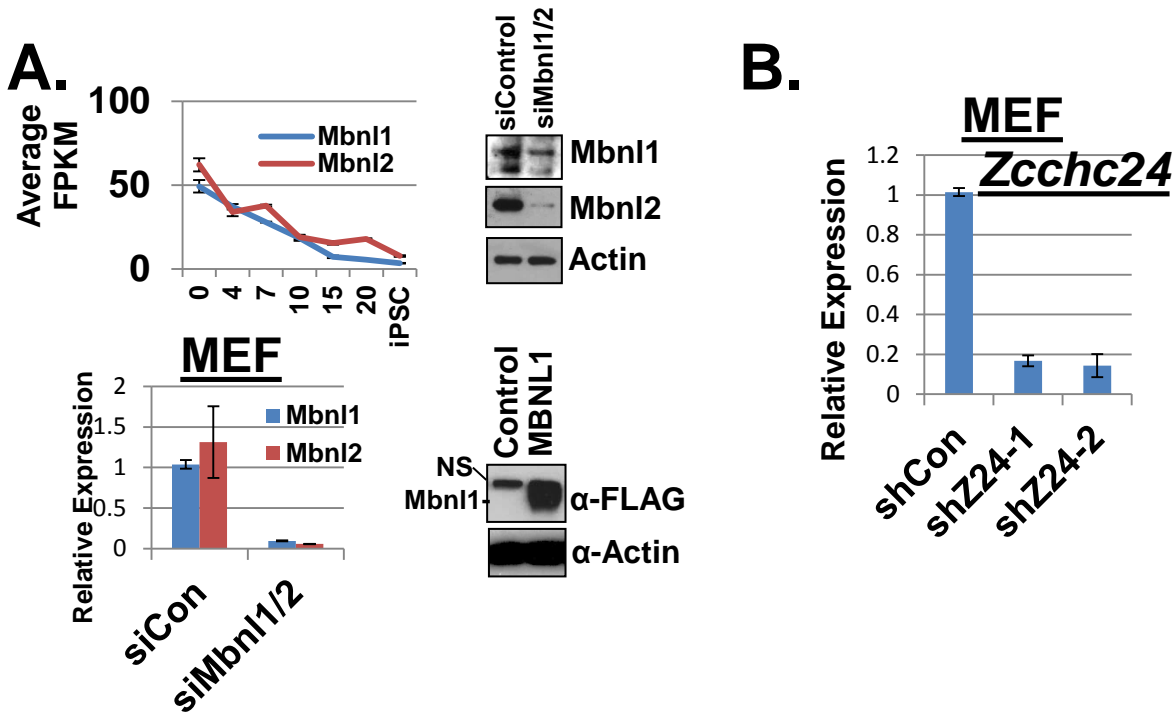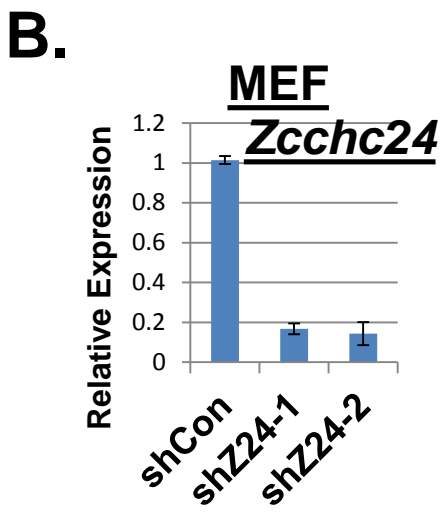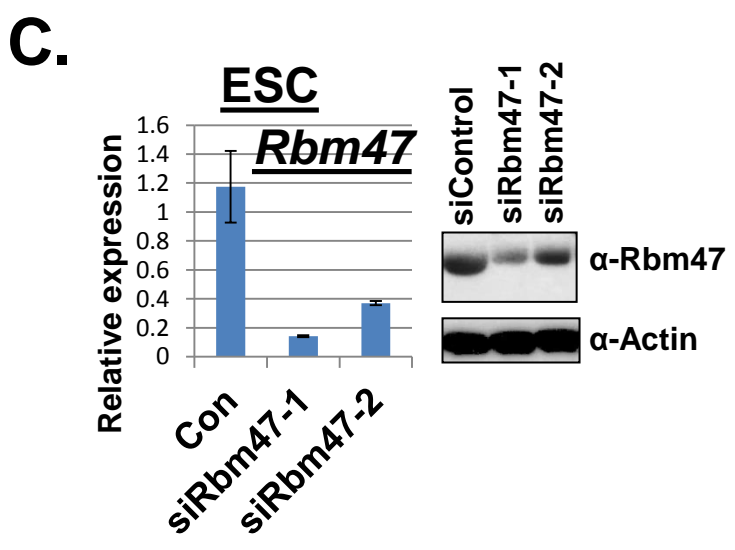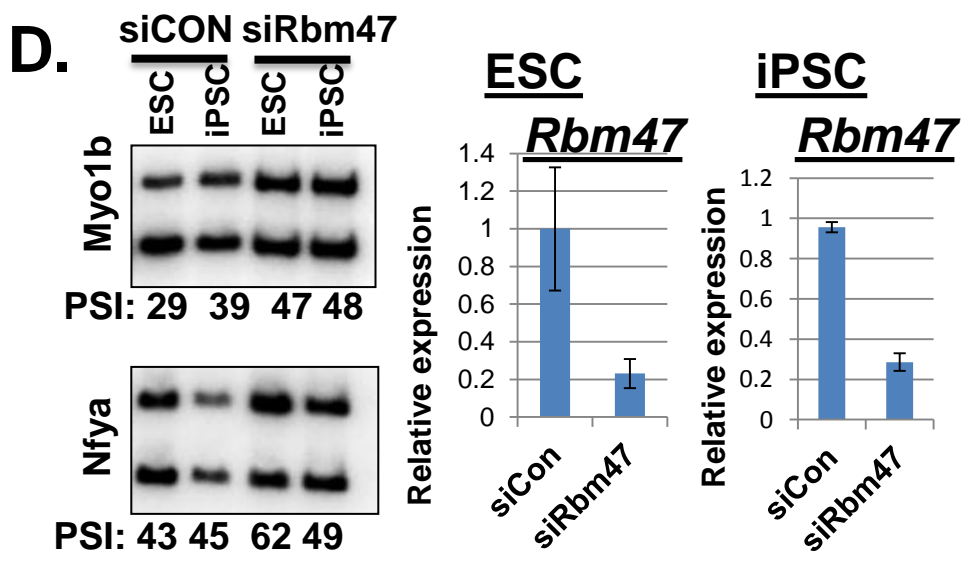

# Figure S3.

A.

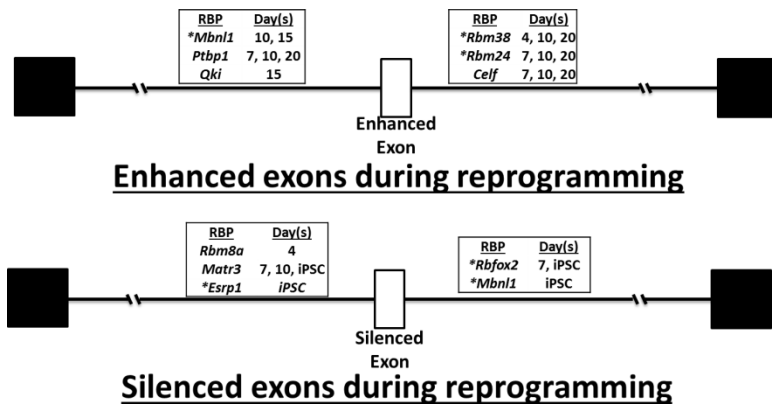

B. MEF ESC

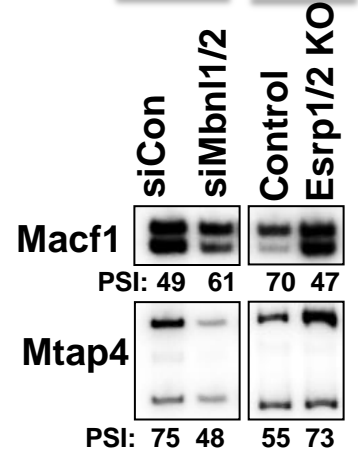

C.

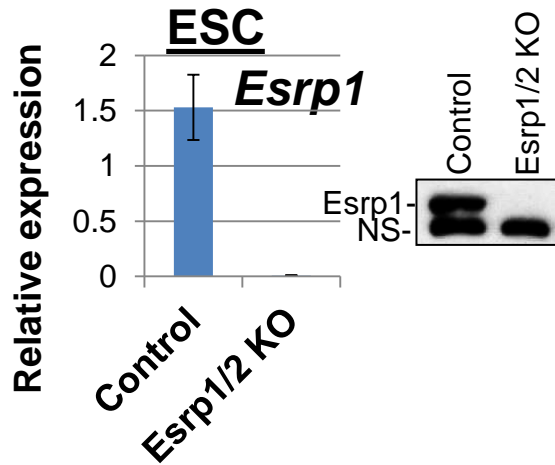

D.

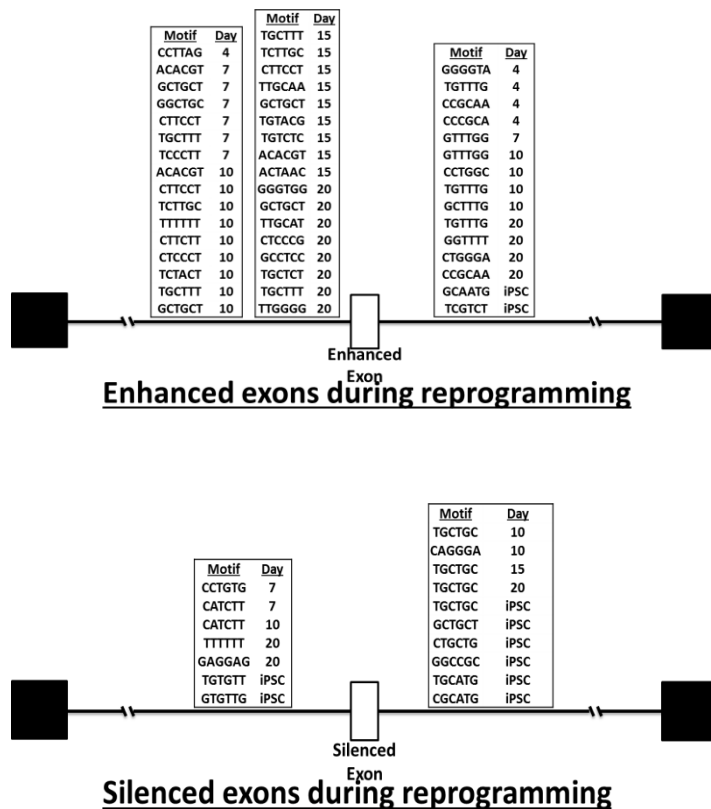

# Figure S4.

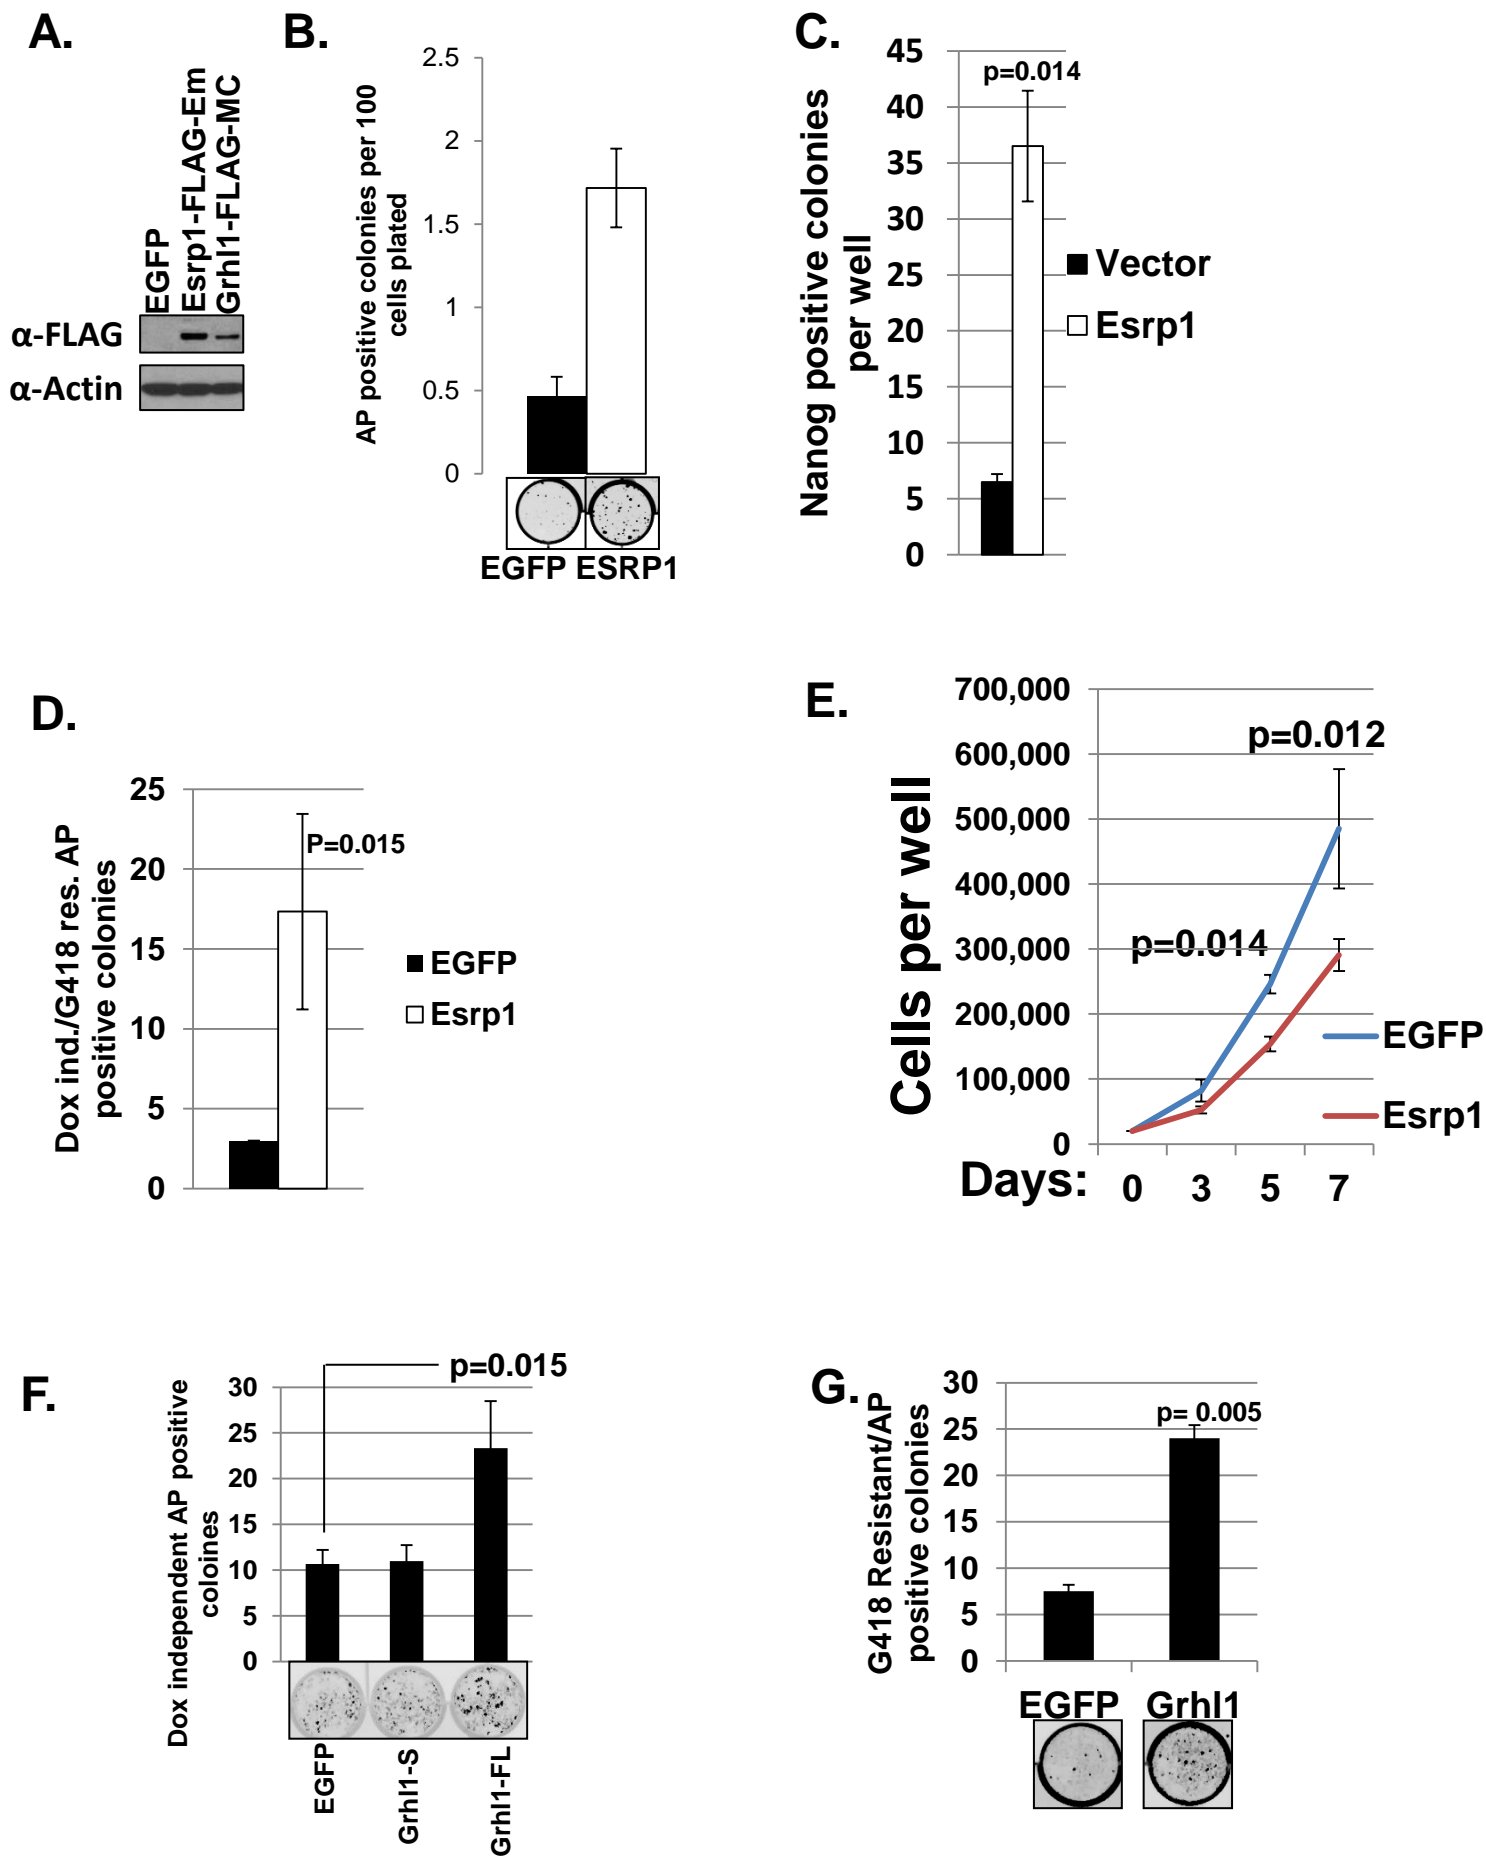

## **Supplemental Figure and Table Legends:**

**Figure S1, Related to Figure 1:** A) *Nanog* qRT-PCR in the three iPSC clones conducted in technical triplicate that were used for RNA sequencing as well ESCs. B) Phase contrast images for each iPSC clone.

**Figure S2, Related to Figure 2:** A) Average FPKM of *Mbnl1* and 2 during reprogramming timecourse (upper left); qRT-PCR for *Mbnl1* and *Mbnl2* in MEFs after control or *Mbnl1* and *Mbnl2* targeting siRNA transfections (lower left) and western blot (upper right); FLAG western blot demonstrating expression of MBNL1-2x-FLAG-Emerald-GFP (or Actin) in ES cells after transfection (lower right). B) qRT-PCR analysis of *Zcchc24* in MEFs after transduction with control or two different *Zcchc24* targeting shRNA's. C) qRT-PCR for *Rbm47* in ES cells after transfection with control or two different *Rbm47* targeting siRNAs (left graph) and western blot (right). D) *siRbm47* pool transfected into ESCs or iPSCs followed by RT-PCR to assess splicing changes in *Myo1b* and *Nfya* (left) and qRT-PCR to validate knock down (right graphs). Error bars for all qRT-PCRs represent SDM of technical duplicate.

**Figure S3, Related to Figure 2:** A) Enrichment for known RBP motifs in the introns up or downstream of exons that change during reprogramming. The reprogramming timepoint(s) where the enrichment was identified is listed to the right of each RBP gene symbol. (\*change in expression by at least 2 fold). B) RT-PCR analysis of two AS events that are reciprocally regulated by *Mbnl1/2* knock down in MEFs or *Esrp1/2* knock out in ES cells (the *Macf1* results are also shown in figure 2B and 3B). C) Control or *Esrp1/2* knock out ES cells assayed for *Esrp1* expression via qRT-PCR (left graph) or western blot (right), NS is non-specific band. D) Unbiased analysis of all 6mers enriched near exons that change during reprogramming.

**Figure S4, Related to Figure 3 and 4:** A) Western blot analysis of protein from MEFs that were infected with EGFP, *Esrp1*-FLAG-Emerald, or *Grhl1*-FLAG-mCherry. B) Dox reprogrammable MEFs transduced with EGFP or *Esrp1*-emerald retrovirus and assayed for AP positive colonies after 10 days of dox treatment conducted in biological triplicate. C) Dox reprogrammable MEFs transduced with either empty vector or *Esrp1*-2xFLAG and then assayed for *Nanog* positive colonies after 12 days of dox treatment via immunofluorescence conducted in biological duplicate. D) Dox reprogrammable MEFs transduced with either EGFP or *Esrp1*-emerald and treated with dox for 10 days upon which dox was removed and G418 was added and grown for an additional 10 days then fixed and stained for AP, conducted in biological triplicate. E) Doxycycline reprogrammable MEFs were infected with EGFP or *Esrp1*-Emerald and assayed, in the presence of Dox, for cell proliferation by cell counting over 7 days in triplicate. F) Dox reprogrammable MEFs transduced with either EGFP, *Grhl1*-S, or *Grhl1*-FL and treated with Dox for 10 days upon which it was removed and then AP positive colonies were quantified 7 days later, conducted in biological triplicate. G) Dox reprogrammable MEFs transduced with either EGFP or *Grhl1*-FL and treated with dox for 10 days upon which G418 was added; then fixed and stained for AP 10 days later, conducted in biological duplicate. All p-values calculated by students t-test. Error bars represent SDM in all experiments shown.

**Table S1, Related to Figure 1:** All cassette exons with significant changes in alternative splicing during reprogramming identified by rMATS as having an FDR of less than 5% and delta percent spliced in (PSI) of at least 5% at one or more timepoints relative to time zero. ID in heat map, gene ID, gene symbol and exon coordinates are indicated in columns A-D; iPS-0 is MEFs; iPS-4, iPS-7, iPS-10, iPS-15, iPS-20 are 4, 7, 10, 15, and 20 days of Dox treatment respectively and iPSC are transgene independent clones. SC is skipped counts; IC is inclusion counts (columns E-BF); PSI of triplicates for each time point (Columns BG-CB).

**Table S2, Related to Figure 1 and 2:** Tab A) List of cassette exons arranged in temporal clusters based on changes in alternative splicing; minimum of 5 exons per cluster. The cluster ID is listed in column A. Tab B) List of RNA binding proteins arranged in temporal clusters based on expression changes. The cluster ID is listed in column A. Tab C) Correlation coefficients between alternative exons and RBP expression changes across the time course.

**Table S3, Related to Figure 2:** FPKM of all mouse genes during reprogramming in triplicate; gene ID, gene symbol, and genomic locus are indicated in columns A-C; iPS-0 is MEFs; iPS-4, iPS-7, iPS-10, iPS-15, iPS-20 are 4, 7, 10, 15, and 20 days of Dox treatment respectively and iPSC are transgene independent clones.

**Table S4, Related to Figure 3:** MATS analysis of *Esrp1*<sup>WT</sup>/*Esrp2*<sup>-/-</sup> vs. *Esrp1*<sup>flox/flox</sup>/*Esrp2*<sup>-/-</sup> ES cells following transfection with Cre to mediate ablation of floxed *Esrp1* conducted in ES cells derived from 3 independent blastocysts per group.

## **Supplemental Experimental Procedures**

### **Cell culture**

Mouse embryo fibroblasts were isolated at E12.5 by mincing, incubation with 0.25% Trypsin/EDTA for 20 minutes followed by trituration. They were cultured at 5% CO<sub>2</sub> and 5% O<sub>2</sub> in MEF media (DMEM, 10% FBS, non essential amino acids (Gibco 11140-050); Pen/Strep (Gibco15140-122) 1mM sodium pyruvate (Gibco 11360-070); 0.1 mM beta-mercaptoethanol (Gibco 21985-023). Embryonic stem cells were isolated from E3.5 blastocysts and maintained in ES-media (Knock-Out DMEM (Gibco); 10% FBS ES tested; nonessential amino acids (Gibco 11140-050); Pen/Strep (Gibco15140-122); 0.1 mM beta-mercaptoethanol (Gibco 21985-023) L-Glutamine (Gibco 25030-081); ESGRO-LIF (Millipore)) on irradiated feeder MEFs. Ablation of the *Esrp1* floxed region (an *Esrp1* allele with LoxP sites flanking exons 7, 8 and 9) (Bebee et al., 2015) was mediated by pLVX-Cre-EGFP-IRES-PURO transfection using X-Fect-ES Reagent (Clontech).

### **Antibodies**

FLAG-M2, mouse, Sigma; Nanog, rabbit, Bethyl; Rbm47, rabbit, Sigma; *Esrp1*-27H12, mouse, Rockland; Mbnl1 and Mbnl2 mouse, Santa Cruz Biotechnology.

### **Generation of expression vectors for Grhl1 and MBNL1**

Grhl1 cDNA clone MmCD00312394 was obtained from the Harvard PlasmID Database and amplified using primers: Grhl1-Topo-F: CACCATGACACAGGAGTACGACAA; Grhl1-Topo-R: GGCAATCTCTGTCCAGGGTGAGCT and cloned into pENTR-D-Topo (Life Technologies) according to the manufacturer's protocol. The cDNA was then transferred into pMXS-CFFB-mCherry-IRES-Blast2-Gateway or pMXS-CFFB-IRES-Puro-Gateway via Gateway cloning to express the Grhl1-2x-FLAG or Grhl1-2x-FLAG-mCherry fusion-proteins. The Grhl1-Short isoform was generated using primers Grhl1-Topo-F and Grhl1-ex5-Skip-R: GGCAAGTTGTTCTCCTGAACGCCCTCCTTGA in the same manner.

MBNL1 cDNA clone, accession BC043493 was cloned into the ECORV and NOT1 sites of pIPX-CFFB-Emerald-GFP.

### **RNA isolation, RNA-sequencing and RT-PCR**

RNAs were harvested using Trizol reagent (Life Technologies). cDNA libraries for RNA-sequencing were prepared with poly-A purified mRNAs and the TruSeq™ Stranded mRNA LT Sample Prep Kit (Illumina) according to the manufacturers protocol. We generated ~734 million 101x2 bp paired-end and ~335 million 101 bp single-end RNA-seq reads on a HiSeq 2000 sequencer. The RNA-seq data has been deposited into the NCBI Gene Expression Omnibus under the accession number GSE70022.

Quantitative RT-PCR was conducted using either Taqman for *Esrp1* normalized to *Gapdh* or Sybergreen for *Zcchc24*, *Mbnl1*, *Mbnl2*, *Rbm47* and *Nanog* normalized to *B2m* or *Gapdh*. For semi-quantitative radioactive labeled RT-PCR of alternative splicing of cassette exons, primers were designed in the constitutive exons flanking the alternative exon and amplicons that represented the included (larger) or skipped(smaller) form were resolved using 5% polyacrylamide gel electrophoresis. Gels were dried and scanned on a Typhoon FLA9500; band intensity was quantified using Image Quant.

### **RNA-sequencing analysis**

We first mapped RNA-seq reads to the mouse genome (mm10) and transcriptome (Ensembl, release 72) using the software TopHat (v1.4.1) allowing up to 3 bp mismatches per read and up to 2 bp mismatches per 25 bp seed. We mapped single-end and paired-end reads separately then merged the mapping results for the downstream analysis. We used Cuffdiff (v2.2.0) to calculate RNA-seq based gene expression levels using the FPKM metric (fragments per kilobase of exon per million fragments mapped) then identified differential gene expression between the two time points at FDR<5%, >2 fold difference in gene expression based on average FPKM, and minFPKM>0.1. To identify differential AS events between DAY0 and other time points (DAY4 through DAY20 and iPS clone), we used a modified version of rMATS v3.0.8 (<http://rnaseq-mats.sourceforge.net>) to identify differential AS events

from strand-specific RNA-seq data corresponding to all five basic types of AS patterns. Briefly, rMATS uses a modified version of the generalized linear mixed model to detect differential AS from RNA-seq data with replicates (Shen et al., 2014). It accounts for exon-specific sequencing coverage in individual samples as well as variation in exon splicing levels among replicates. For each AS event, we used both the reads mapped to the splice junctions and the reads mapped to the exon body as the input for rMATS.

### **Temporal cluster analysis of time-course iPSC RNA-seq data**

We compiled a list of 226 genes encoding RNA binding proteins (RBPs) involved in splicing regulation. From this list, we identified 95 RBPs that met the following three criteria: (1) expressed in at least one of the 7 time points (average FPKM gene expression value > 5.0); (2) significant change in FPKM values across the 7 time points (ANOVA  $p < 0.01$ ); (3) at least two-fold change in FPKM values between the two time points with the highest and lowest average expression levels. We considered these 95 RBPs as candidate RBPs that may drive alternative splicing changes during iPSC reprogramming. To separate these 95 RBPs into subgroups representing distinct temporal patterns of gene expression during iPSC reprogramming, we performed cluster analysis of the time-course RNA-seq data followed by cutting of the cluster dendrogram at the appropriate height. Specifically, for every pair of RBPs we calculated the Jackknife version of Pearson correlation coefficient using their expression levels across the entire time course (7 time points x 3 replicates). Using a permutation procedure, we estimated an FDR of <0.01 at a correlation coefficient threshold of 0.5. We then cut the clustering dendrogram at a height of 0.5 (i.e. 1- correlation coefficient threshold of 0.5) and separated the 95 RBPs into 9 distinct clusters. Using a similar approach, we performed temporal cluster analysis of differential exon skipping events during iPSC reprogramming identifying 284 exons in 18 clusters, at a Jackknife correlation coefficient threshold of 0.5 and a minimum of 5 exons per cluster (FDR=0.02 based on permutation test).

### **Motif Enrichment Analysis**

We sought to identify binding sites of splicing factors and other RNA binding proteins that were significantly enriched in differential exon skipping events between two time points as compared to control (non-regulated) alternative exons. We collected 115 known binding sites of RNA binding proteins including many well-characterized splicing factors from the literature (Ray et al., 2013). For each motif, we scanned for motif occurrences separately in exons or their 250 bp upstream or downstream intronic sequences. For intronic sequences, we excluded the 20 bp sequence within the 3' splice site and the 6 bp sequence within the 5' splice site. Alternative exons without splicing changes (rMATS FDR>50%, maxPSI>15%, minPSI<85%) in highly expressed genes (average FPKM>5.0 in at least one time point) were treated as control exons. For each motif, after we counted the number of occurrences in the differentially spliced exons and the control exons, we calculated p-value for motif enrichment via the Fisher's exact test (right-sided) and used Benjamini-Hochberg FDR correction to adjust for multiple testing for exons, upstream intronic sequences, and downstream intronic sequences separately. A motif can be counted multiple times in a given sequence (by-NT) or a motif can only be counted zero or one time in a given sequence (by-Sequence). We conducted both motif counting approaches and identified enriched motifs at FDR(by-NT)<5% and p-value(by-Sequence)<0.01.

### **Esrp RNA map analysis**

We used top twelve GU-rich Esrps binding sites previously identified by the SELEX-Seq (Dittmar et al., 2012) to identify the RNA binding map of the Esrps for the differential SE events between two time points as compared to control alternative exons. We assigned motif scores based on the overall percentage of nucleotides covered by any of twelve Esrp binding sites within a 50-nt window. We slid this window by 1-nt across the exon body and 250 nt of upstream and downstream intron as well as the upstream and downstream exons.

### **RT-PCR primers flanking alternative exons:**

| Sequence Name | Sequence                      |
|---------------|-------------------------------|
| Azi2-F        | CTG GGA ACT GAA GAG GGA GAT G |
| Azi2-R        | TTT AGG AGG GCT TGG GAA TAC C |
| Bc037034-F    | TGC CCT GGA GGA ACA CAA CT    |



|            |                                 |
|------------|---------------------------------|
| Bc037034-r | TCC GGG AGA AGC CAA GAT TAT     |
| Fgfr1-F    | GGG ACC GCA GCG CCA AGT GAG AGT |
| Fgfr1-R    | AGC TAC AGG CCT ACG GTT TGG TTT |
| Map3k4-F   | AGT TTG CAA GCC CTG ATG AAT GAG |
| Map3k4-R   | CGC ACA CTT GGC CGA TGA TA      |
| Tead1-F    | GCC GTG TGG GAG GAG AAA AAT CAT |
| Tead1-R    | TCC TGG CTG TCC TGT CTG TAT CAT |
| Mta1-F     | GGT AGT ACG GAA GCC CCT GGA G   |
| Mta1-R     | CAT TCG CCG CCG CTT GAC TGG A   |
| Map4-F     | GAG GGG AAA CCT GCT GAT GTC AAA |
| Map4-R     | CGC CCT CAG TCT TCA CGG CAC CTC |
| Nfya-F     | GCT GCC TGG GAT CTG TAG AGT GAA |
| Nfya-R     | AGC CTG CCC ACC CTG AAT CTG GAT |
| Ubp21-F    | GCC CCC TTT ATG CAT ATT CTG ACC |
| Ubp21-R    | ATC GCC CCA CAT TCT TTT CT      |
| Kans11-F   | ACACCATGCCTCCTGAAATACACT        |
| Kans11-R   | CTCTCCCTTCTCCTCCTCACT           |
| Exoc1-F    | ACTCCGACTATATGAAAGAGAAAT        |
| Exoc1-R    | GGACGACTGGGACCTGCGACTG          |
| Map3k7-F   | TTCCTGCCACAAACGACAC             |
| Map3k7-R   | ATTCTGACACTAGGGCTGGATGAC        |
| Myo1b-F    | AAGCGGTACCAGCAGATAAAGAGT        |
| Myo1b-R    | AGTCGAATCCAAGAACAGGTAAGG        |
| Lsm14b-F   | CCTCGGCGACACAGCTCAATGGT         |
| Lsm14b-R   | ATCACAGCTGGGTCCTTCTCTTCC        |
| Epb4.1-F   | TTAACATCAACGGGCAAGTC            |
| Epb4.1-R   | ATATCGGCATCTCCTGTGA             |
| Arhgef11-F | TCAAGCTGAGAACCAGCAGGAAGT        |
| Arhgef11-R | TGCTCGATGGTGTGGAAGATGCACA       |
| Grhl1-F    | ACGGCTTTGCTGTGGGAATC            |
| Grhl1-R    | ACCTCTGTTTGGCCGTGTGCT           |
| Fn1-F      | GCAAGCCAGTTTCCATCAAT            |
| Fn1-R      | TCCTGTCTTCTTTTCGGGTTTAC         |
| Ssbp3-F    | TATTTTGGGACCTTTACTGTGC          |
| Ssbp3-R    | CATGTTGGGGTGACCTTGTTGT          |
| Spag9-F    | ATTCCACGCTCCGCTCTATCA           |
| Spag9-R    | ATCTGCCCCACCACTGCTACTTTG        |

### **qRT-PCR primers**

Rbm47: F-TGAGGCCGTAGCGCAGCAACC; R-CCTCTCCCTCGGCCTTATG

Mbnl1: F-CGACCAGACACGGAATGTAA ;R-TCTCTGGAGCAACGACCTTT

Mbnl2: F-CTCCGACGAAGAATGCAAGT; R-GTTCTCTCTTGAACAGCGGC

Gapdh (internal control): F-TCGTCCCGTAGACAAAATGG; R-TTGAGGTCAATGAAGGGGTC

B2m (internal control): F-TGGTCTTTCTGGTGCTTGTC; R-GGGTGGAAGTGTGTTACGTAG

Nanog: F-CCTCCAGCAGATGCAAGAACTC; R-CTTCAACCACTGGTTTTTCTGCC

Zcchc24: F-GGCCTCCTCCGAACTACC; R-GCATTGGGGCACTTGTA

Esrp1: Taqman assay: Mm01220936\_g1

Gapdh: Taqman assay: Mm99999915\_g1

### **shRNA and siRNA**

Target sequences for Zcchc24 were: GCTGCTTTGGCGAGTACAAGT and AGCTAGCTGCAGGGTAGATTT. Control shRNA sequence was: CAACAAGATGAAGAGCACCAA. siMBNL1/2 pools were described previously (Han et al. 2013). Rbm47 siRNAs were from Qiagen, siRbm47-1 (SI00917826) and siRbm47-2 (SI00917833). Control siRNA was the All Stars Negative Controls (SI03650318).

### **Supplemental References**

Beebe, T.W., Park, J.W., Sheridan, K.I., Warzecha, C.C., Cieply, B.W., Rohacek, A.M., Xing, Y., and Carstens, R.P. (2015). The splicing regulators Esrp1 and Esrp2 direct an epithelial splicing program essential for mammalian development. *eLife* 4.

Dittmar, K.A., Jiang, P., Park, J.W., Amirikian, K., Wan, J., Shen, S., Xing, Y., and Carstens, R.P. (2012). Genome-wide determination of a broad ESRP-regulated posttranscriptional network by high-throughput sequencing. *Mol Cell Biol* 32, 1468-1482.

Ray, D., Kazan, H., Cook, K.B., Weirauch, M.T., Najafabadi, H.S., Li, X., Gueroussov, S., Albu, M., Zheng, H., Yang, A., *et al.* (2013). A compendium of RNA-binding motifs for decoding gene regulation. *Nature* 499, 172-177.

Shen, S., Park, J.W., Lu, Z.X., Lin, L., Henry, M.D., Wu, Y.N., Zhou, Q., and Xing, Y. (2014). rMATS: robust and flexible detection of differential alternative splicing from replicate RNA-Seq data. *Proc. Natl. Acad. Sci. U. S. A.* 111, E5593-5601.
